# Supplementary material
Source: PubMed Central journal article supplement (PMC1712613)
Supplement: NIHMS14677-supplement-1.pdf [file NIHMS14677-supplement-1.pdf]

## Supplemental Data

### Stabilization of Cell Polarity by the *C. elegans*

#### RING Protein PAR-2

Yingsong Hao, Lynn Boyd, and Geraldine Seydoux

Table S1. Strains Used in This Study

| Name   | Description                                                          | Genotype                                                                            | Reference             |
|--------|----------------------------------------------------------------------|-------------------------------------------------------------------------------------|-----------------------|
| KK747  | <i>par-2</i>                                                         | <i>unc-45(e286ts)par-2(lw32)/sC1[dpy-1(s2171)let]</i>                               | (Edgley et al., 1995) |
| JH1623 | $P_{pie-1}$ :GFP:PAR-2                                               | <i>unc-119(ed3); [pYH2.31]</i>                                                      | This study            |
| JH1950 | $P_{pie-1}$ :GFP:PAR-2(413-628)                                      | <i>unc-119(ed3); [pYH2.50]</i>                                                      | This study            |
| JH1747 | $P_{pie-1}$ :GFP:PAR-2(289-628)                                      | <i>unc-119(ed3); [pYH2.55]</i>                                                      | This study            |
| JH1619 | $P_{pie-1}$ :GFP:PAR-2(178-628)                                      | <i>unc-119(ed3); [pYH2.38]</i>                                                      | This study            |
| JH1936 | $P_{pie-1}$ :GFP:PAR-2(1-177)                                        | <i>unc-119(ed3); [pYH2.51]</i>                                                      | This study            |
| JH1937 | $P_{pie-1}$ :GFP:PAR-2(1-288)                                        | <i>unc-119(ed3); [pYH2.80]</i>                                                      | This study            |
| JH1751 | $P_{pie-1}$ :GFP:PAR-2(1-412)                                        | <i>unc-119(ed3); [pYH2.53]</i>                                                      | This study            |
| JH1754 | $P_{pie-1}$ :GFP:PAR-2(178-412)                                      | <i>unc-119(ed3); [pYH2.61]</i>                                                      | This study            |
| JH1752 | $P_{pie-1}$ :GFP:PAR-2(289-412)                                      | <i>unc-119(ed3); [pYH2.60]</i>                                                      | This study            |
| JH1784 | $P_{pie-1}$ :GFP:PAR-2(178-412) <sup>7S/A</sup>                      | <i>unc-119(ed3); [pYH2.67]</i>                                                      | This study            |
| JH1938 | $P_{pie-1}$ :GFP:PAR-2 <sup>7S/A</sup>                               | <i>unc-119(ed3); [pYH2.83]</i> *This strain is unstable, may no longer express GFP. | This study            |
| JH1939 | $P_{pie-1}$ :GFP:PAR-2 <sup>7S/E</sup>                               | <i>unc-119(ed3); [pYH2.90]</i>                                                      | This study            |
| JH1899 | $P_{pie-1}$ :GFP:PAR-2 <sup>7C/S-7S/A</sup>                          | <i>unc-119(ed3); [pYH2.88]</i>                                                      | This study            |
| JH1724 | $P_{pie-1}$ :GFP:PAR-2 <sup>C56S</sup>                               | <i>unc-119(ed3); [pYH2.32]</i>                                                      | This study            |
| JH1592 | $P_{pie-1}$ :GFP:PAR-2 <sup>G433A,K435A</sup>                        | <i>unc-119(ed3); [pYH2.29]</i>                                                      | This study            |
| JH1878 | $P_{pie-1}$ :GFP:PAR-2 <sup>7C/S</sup>                               | <i>unc-119(ed3); [pYH2.87]</i>                                                      | This study            |
| JH1649 | $P_{pie-1}$ :GFP:PAR-2 in <i>par-2</i> mutant                        | <i>unc-119(ed3); [pYH2.31]; unc-45(e286ts)par-2(lw32)/sC1[dpy-1(s2171)let]</i>      | This study            |
| JH1689 | $P_{pie-1}$ :GFP:PAR-2 <sup>G433A,K435A</sup> in <i>par-2</i> mutant | <i>unc-119(ed3); [pYH2.29]; unc-45(e286ts)par-2(lw32)/sC1[dpy-1(s2171)let]</i>      | This study            |
| JH1791 | $P_{pie-1}$ :GFP:PAR-2(1-412) in <i>par-2</i> mutant                 | <i>unc-119(ed3); [pYH2.53]; unc-45(e286ts)par-2(lw32)/sC1[dpy-1(s2171)let]</i>      | This study            |
| JH1790 | $P_{pie-1}$ :GFP:PAR-2 <sup>C56S</sup> in <i>par-2</i> mutant        | <i>unc-119(ed3); [pYH2.32]; unc-45(e286ts)par-2(lw32)/sC1[dpy-1(s2171)let]</i>      | This study            |

| Name   | Description                                                                           | Genotype                                                                                   | Reference  |
|--------|---------------------------------------------------------------------------------------|--------------------------------------------------------------------------------------------|------------|
| JH1640 | $P_{pie-1}$ :GFP:PAR-2(178-628) in <i>par-2</i> mutant                                | <i>unc-119(ed3); [pYH2.38]; unc-45(e286ts)par-2(lw32)/sC1[dpy-1(s2171)let]</i>             | This study |
| JH1902 | $P_{pie-1}$ :RFP:PAR-6; $P_{pie-1}$ :GFP:PAR-2 <sup>C56S</sup> in <i>par-2</i> mutant | <i>unc-119(ed3)?; [pKC1.02]; [pYH2.32]; unc-45(e286ts)par-2(lw32)/sC1[dpy-1(s2171)let]</i> | This study |
| JH1984 | $P_{pie-1}$ :GFP:PAR-2 <sup>7CIS</sup> in <i>par-2</i> mutant                         | <i>unc-119(ed3); [pYH2.87]; unc-45(e286ts)par-2(lw32)/sC1[dpy-1(s2171)let]</i>             | This study |
| JH1958 | $P_{heat-shock}$ :PAR-2 <sup>7S/A</sup> :GFP                                          | <i>unc-119(ed3); [pYH2.89]</i>                                                             | This study |
| JH1959 | $P_{heat-shock}$ :PAR-2 <sup>7CIS-7S/A</sup> :GFP                                     | <i>unc-119(ed3); [pYH2.90]</i>                                                             | This study |
